# Supplementary material for: Near-unity photoluminescence quantum yield in zero-dimensional lead-free indium-based hybrid perovskites by antimony doping
Source: Royal Society of Chemistry journal article supplement (doi:10.1039/d3tc04202b), 2024-01-01
Supplement: d3tc04202b1.pdf [file d3tc04202b1.pdf]

## Supporting Information

### **Near-Unity Photoluminescence Quantum Yield in Zero-Dimensional Lead-free Indium-Based Hybrid Perovskites by Antimony Doping**

Jingheng Nie<sup>‡, 1</sup>, Xiangyan Yun<sup>‡, 2</sup>, Fangrui Cheng<sup>1</sup>, Ban Lan<sup>1, \*</sup>, Renping Cao<sup>1, \*</sup>, Jing Wang<sup>1, 3, \*</sup>

<sup>1</sup> *Guangdong Rare Earth Photofunctional Materials Engineering Technology Research Center, School of Chemistry and Environment, Jiaying University, Meizhou, 514015, P. R. China*

<sup>2</sup> *International Collaborative Laboratory of 2D Materials for Optoelectronics Science and Technology of Ministry of Education, Institute of Microscale Optoelectronics, Shenzhen University, Shenzhen 518060, P. R. China*

<sup>3</sup> *Ministry of Education Key Laboratory of Bioinorganic and Synthetic Chemistry, State Key Laboratory of Optoelectronic Materials and Technologies, Sun Yat-Sen University, Guangzhou, Guangdong 510275, China*

\*R. C. E-mail: [jxcrp@163.com](mailto:jxcrp@163.com)

\*B. L. E-mail: [jyulb6@163.com](mailto:jyulb6@163.com)

\*J. W. E-mail: [ceswj@mail.sysu.edu.cn](mailto:ceswj@mail.sysu.edu.cn)

‡ The authors contributed equally to this work.

## Experimental section

### 1. Materials:

Indium(III) chloride ( $\text{InCl}_3$ , 99.99% metal basis) and *N, N*-Dimethylformamide ( $\text{C}_3\text{H}_7\text{NO}$ , DMF) were purchased from Macklin. Antimony trichloride ( $\text{SbCl}_3$ , 99.9% metal basis) was purchased from Aladdin. Tetramethylammonium chloride ( $\text{C}_4\text{H}_{12}\text{NCl}$ , TMAC, 98% metals basis) was purchased from Shanghai Acme Biochemical Co., Ltd., China. Hydrochloric acid ( $\text{HCl}$ , 38% in water by weight) was purchased from Sinopharm Chemical Reagent Co. Ltd., China. All chemicals were used as received without further purification.

### 2. Preparation of Single Crystals and LEDs:

#### 2.1 Growth of $(\text{C}_4\text{H}_{12}\text{N})_2\text{InCl}_5\cdot\text{DMF}$ and $(\text{C}_4\text{H}_{12}\text{N})_2\text{InCl}_5\cdot\text{DMF}:\text{Sb}^{3+}$ Single Crystals.

First,  $\text{InCl}_3$  (2 mmol, 4424 g) and TMAC (4 mmol, 0.4384 g) were dissolved in 8 mL of DMF solution. Then transfer it to a Teflon autoclave and add 2 mL of  $\text{HCl}$ . The mixture was heated at  $175^\circ\text{C}$  for 12 h and slowly cooled to  $30^\circ\text{C}$ . The transparent bulk crystals were synthesized, washed with DMF, and dried in a vacuum oven at  $65^\circ\text{C}$  overnight. Similarly, to obtain the  $\text{Sb}^{3+}$ -doped crystals, varying amounts of  $\text{SbCl}_3$  were added to the Teflon autoclave, when the total amount of  $\text{SbCl}_3$  and  $\text{InCl}_3$  is 2 mmol.

#### 2.2 Fabrication of LEDs

This work thoroughly stirred the mixture of  $(\text{C}_4\text{H}_{12}\text{N})_2\text{InCl}_5\cdot\text{DMF}:\text{Sb}^{3+}$  samples and epoxy resin AB adhesive, and coated the prepared mixture on the LED chip (310 nm), followed by drying treatment.

### 3. Characterization:

The powder XRD (PXRD) patterns were performed by grinding  $(C_4H_{12}N)_2InCl_5 \cdot DMF$  crystals into fine powders in a mortar, using an X-ray diffractometer (D2 Phaser) with Cu  $K\alpha$  radiation at  $\lambda = 1.5418 \text{ \AA}$ . The single-crystal XRD (SCXRD) pattern was measured using SuperNova single crystal diffractometer (EosS2 diffractometer). A simulation PXRD data was obtained by single-crystal XRD. UV-vis absorption spectra were recorded on a domestically produced ultraviolet spectrophotometer (UV-2600i, Shimadzu). The PLE spectra, the PL spectra, and the decay curves were measured using an Edinburgh fluorescence spectrophotometer (FS5). PLQYs were measured using a FS5 fluorescence spectrometer with an integrating sphere attachment. The excitation and emitted light from all directions of the sample surface were homogenized by the integrating sphere, and light at the exit port entered the monochromator to be detected. The specific PLQY calculation formula is as follows:

$$\Phi = \frac{E_c - E_a}{L_a - L_c}$$

where  $\Phi$  is the absolute PLQY,  $L_a$  is the total amount of excitation light,  $L_c$  is the amount of residual excitation light after direct excitation,  $E_c$  is the amount of emitted light, and  $E_a$  is the sphere's background. Spectral correction (emission arm) is applied to the raw data after background subtraction, and from these spectrally corrected curves the quantum yield is calculated using aF900 software wizard.

The PL spectra of LEDs were measured by a handheld spectroradiometer (HPCS320D, HOPOOCOLOR).



**Table S1.** Crystal data and structure refinement for (C<sub>4</sub>H<sub>12</sub>N)<sub>2</sub>InCl<sub>5</sub>·DMF at 293.15 K.

|                                             |                                                                    |
|---------------------------------------------|--------------------------------------------------------------------|
| Empirical formula                           | C <sub>11</sub> H <sub>31</sub> Cl <sub>5</sub> InN <sub>3</sub> O |
| Formula weight                              | 457.24                                                             |
| Temperature/K                               | 513.46                                                             |
| Crystal system                              | Monoclinic                                                         |
| Space group                                 | C2/c                                                               |
| a/Å                                         | 13.7556(18)                                                        |
| b/Å                                         | 11.5098(11)                                                        |
| c/Å                                         | 13.7448(17)                                                        |
| α/°                                         | 90                                                                 |
| β/°                                         | 94.594(11)                                                         |
| γ/°                                         | 90                                                                 |
| Volume/Å <sup>3</sup>                       | 2169.1(4)                                                          |
| Z                                           | 4                                                                  |
| ρ <sub>calc</sub> /cm <sup>3</sup>          | 1.572                                                              |
| μ/mm <sup>-1</sup>                          | 1.707                                                              |
| F(000)                                      | 1040.0                                                             |
| Radiation                                   | MoKα (λ = 0.71073)                                                 |
| 2θ range for data collection/°              | 7.08 to 49.964                                                     |
| Index ranges                                | -16 ≤ h ≤ 16, -13 ≤ k ≤ 13, -16 ≤ l ≤ 15                           |
| Reflections collected                       | 9555                                                               |
| Independent reflections                     | 1906 [R <sub>int</sub> = 0.2292, R <sub>sigma</sub> = 0.1016]      |
| Data/restraints/parameters                  | 1906/18/112                                                        |
| Goodness-of-fit on F <sup>2</sup>           | 1.065                                                              |
| Final R indexes [I >= 2σ (I)]               | R <sub>1</sub> = 0.0891, wR <sub>2</sub> = 0.2277                  |
| Final R indexes [all data]                  | R <sub>1</sub> = 0.0952, wR <sub>2</sub> = 0.2362                  |
| Largest diff. peak/hole / e Å <sup>-3</sup> | 2.29/-1.50                                                         |

**Table S2.** Fractional Atomic Coordinates ( $\times 10^4$ ) and Equivalent Isotropic Displacement Parameters ( $\text{\AA}^2 \times 10^3$ ) for  $(\text{C}_4\text{H}_{12}\text{N})_2\text{InCl}_5 \cdot \text{DMF}$  at 293.15 K.  $U_{\text{eq}}$  is defined as 1/3 of the trace of the orthogonalized  $U_{ij}$  tensor.

| Atom | $x$        | $y$       | $z$        | $U_{\text{eq}}$ |
|------|------------|-----------|------------|-----------------|
| In1  | 5000       | 2638.6(7) | 7500       | 33.7(5)         |
| Cl1  | 5393.6(17) | 2842(3)   | 9281.1(15) | 56.1(8)         |
| Cl2  | 3224.8(19) | 2749(3)   | 7785(2)    | 67.0(9)         |
| Cl3  | 5000       | 495(3)    | 7500       | 53.5(9)         |
| O1   | 5235(9)    | 4613(11)  | 7315(10)   | 52(3)           |
| N1   | 5000       | 6467(9)   | 7500       | 47(2)           |
| C2   | 4484(12)   | 7130(15)  | 8140(12)   | 99(4)           |
| C1   | 4846(12)   | 5342(15)  | 7767(12)   | 46(4)           |
| N2   | 2755       | -109(6)   | 4960(4)    | 39.5(15)        |
| C3   | 2520(8)    | 659(10)   | 5767(7)    | 65(3)           |
| C4   | 3119(10)   | 604(12)   | 4170(8)    | 82(4)           |
| C5   | 3528(9)    | -961(11)  | 5304(9)    | 77(3)           |
| C6   | 1866(8)    | -746(11)  | 4590(10)   | 76(3)           |

**Table S3.** Anisotropic Displacement Parameters ( $\text{\AA}^2 \times 10^3$ ) for  $(\text{C}_4\text{H}_{12}\text{N})_2\text{InCl}_5 \cdot \text{DMF}$ .

The Anisotropic displacement factor exponent takes the form:  $-2\pi^2$   
[ $h^2a^2U_{11}+2hka^*b^*U_{12}+\dots$ ].

| Atom | $U_{11}$ | $U_{22}$ | $U_{33}$ | $U_{23}$  | $U_{13}$ | $U_{12}$ |
|------|----------|----------|----------|-----------|----------|----------|
| In1  | 44.3(7)  | 31.4(7)  | 23.1(7)  | 0         | -11.5(4) | 0        |
| Cl1  | 58.2(14) | 83.9(18) | 23.2(12) | -11.9(11) | -13.9(9) | -0.5(12) |
| Cl2  | 50.0(14) | 107(2)   | 41.6(15) | -8.2(13)  | -8.8(11) | 24.6(13) |
| Cl3  | 65.3(19) | 30.6(15) | 62(2)    | 0         | -8.4(15) | 0        |
| O1   | 55(5)    | 47(5)    | 55(5)    | 1(4)      | 9(4)     | -1(4)    |
| N1   | 68(6)    | 36(6)    | 35(5)    | 0         | -18(4)   | 0        |
| C2   | 105(8)   | 116(8)   | 81(7)    | -8(7)     | 37(6)    | -13(7)   |
| C1   | 48(5)    | 45(5)    | 45(6)    | 0(4)      | 5(4)     | -2(4)    |
| N2   | 51(3)    | 39(3)    | 27(3)    | 2(3)      | -3(3)    | 1(3)     |
| C3   | 70(6)    | 69(6)    | 55(6)    | -15(5)    | 2(5)     | 6(5)     |
| C4   | 116(9)   | 80(8)    | 52(6)    | 18(6)     | 22(6)    | -11(7)   |
| C5   | 81(7)    | 78(8)    | 69(7)    | -4(6)     | -17(6)   | 31(6)    |
| C6   | 66(6)    | 76(8)    | 83(8)    | -9(7)     | -15(6)   | -18(6)   |

**Table S4.** Bond Lengths for (C<sub>4</sub>H<sub>12</sub>N)<sub>2</sub>InCl<sub>5</sub>·DMF at 293.15 K.

| Atom | Atom             | Length/Å  | Atom | Atom            | Length/Å  |
|------|------------------|-----------|------|-----------------|-----------|
| In1  | C11              | 2.476(2)  | N1   | C2 <sup>1</sup> | 1.400(15) |
| In1  | C11 <sup>1</sup> | 2.476(2)  | N1   | C2              | 1.400(15) |
| In1  | C12              | 2.507(3)  | N1   | C1              | 1.367(19) |
| In1  | C12 <sup>1</sup> | 2.507(3)  | N2   | C3              | 1.474(11) |
| In1  | C13              | 2.467(3)  | N2   | C4              | 1.479(11) |
| In1  | O1               | 2.313(13) | N2   | C5              | 1.495(12) |
| O1   | C1               | 1.195(17) | N2   | C6              | 1.480(12) |



**Table S5.** Bond Angles for (C<sub>4</sub>H<sub>12</sub>N)<sub>2</sub>InCl<sub>5</sub>·DMF at 293.15 K.

| Atom             | Atom | Atom             | Angle/°    | Atom | Atom | Atom             | Angle/°   |
|------------------|------|------------------|------------|------|------|------------------|-----------|
| C11 <sup>1</sup> | In1  | C11              | 169.16(14) | O1   | In1  | C12 <sup>1</sup> | 77.7(3)   |
| C11 <sup>1</sup> | In1  | C12 <sup>1</sup> | 88.82(9)   | O1   | In1  | C13              | 169.4(3)  |
| C11              | In1  | C12 <sup>1</sup> | 90.63(9)   | C1   | O1   | In1              | 124.1(9)  |
| C11              | In1  | C12              | 88.82(9)   | C2   | N1   | C2 <sup>1</sup>  | 114.0(15) |
| C11 <sup>1</sup> | In1  | C12              | 90.63(9)   | C1   | N1   | C2 <sup>1</sup>  | 141.4(11) |
| C12              | In1  | C12 <sup>1</sup> | 174.19(15) | C1   | N1   | C2               | 104.5(9)  |
| C13              | In1  | C11 <sup>1</sup> | 95.42(7)   | O1   | C1   | N1               | 116.1(12) |
| C13              | In1  | C11              | 95.42(7)   | C3   | N2   | C4               | 109.1(9)  |
| C13              | In1  | C12              | 92.90(8)   | C3   | N2   | C5               | 110.3(7)  |
| C13              | In1  | C12 <sup>1</sup> | 92.91(8)   | C3   | N2   | C6               | 109.3(8)  |
| O1               | In1  | C11              | 89.7(4)    | C4   | N2   | C5               | 108.8(9)  |
| O1               | In1  | C11 <sup>1</sup> | 79.6(4)    | C4   | N2   | C6               | 110.0(8)  |
| O1               | In1  | C12              | 96.5(3)    | C6   | N2   | C5               | 109.3(9)  |

**Table S6.** Torsion Angles for  $(\text{C}_4\text{H}_{12}\text{N})_2\text{InCl}_5\cdot\text{DMF}$  at 293.15 K.

| A               | B  | C  | D  | Angle/°    |
|-----------------|----|----|----|------------|
| In1             | O1 | C1 | N1 | -174.2(10) |
| C2              | N1 | C1 | O1 | -179.2(15) |
| C2 <sup>1</sup> | N1 | C1 | O1 | -3(3)      |

**Table S7.** Hydrogen Atom Coordinates ( $\text{\AA}\times 10^4$ ) and Isotropic Displacement Parameters ( $\text{\AA}^2\times 10^3$ ) for  $(\text{C}_4\text{H}_{12}\text{N})_2\text{InCl}_5\cdot\text{DMF}$  at 293.15 K.

| Atom | <i>x</i> | <i>y</i> | <i>z</i> | $U_{\text{eq}}$ |
|------|----------|----------|----------|-----------------|
| H2A  | 4792.9   | 7873.36  | 8238.98  | 149             |
| H2B  | 4479.06  | 6733.75  | 8754.34  | 149             |
| H2C  | 3825.98  | 7237.69  | 7866.32  | 149             |
| H1   | 4460.89  | 5154.64  | 8270.46  | 55              |
| H3A  | 3061.87  | 1164.1   | 5936.5   | 97              |
| H3B  | 2389.08  | 196.45   | 6322.84  | 97              |
| H3C  | 1954.69  | 1115.26  | 5566.14  | 97              |
| H4A  | 2636.01  | 1170.8   | 3957.67  | 123             |
| H4B  | 3249.38  | 112.13   | 3631.94  | 123             |
| H4C  | 3708.41  | 991.6    | 4409.56  | 123             |
| H5A  | 4063.18  | -554.89  | 5642.84  | 116             |
| H5B  | 3753.41  | -1363.59 | 4753.85  | 116             |
| H5C  | 3263.79  | -1509.93 | 5737.98  | 116             |
| H6A  | 1480.98  | -922.51  | 5123.01  | 114             |
| H6B  | 1480.98  | -1455.57 | 4285.08  | 114             |
| H6C  | 1492.39  | -274.48  | 4120.8   | 114             |

**Table S8.** Atomic Occupancy for  $(\text{C}_4\text{H}_{12}\text{N})_2\text{InCl}_5\cdot\text{DMF}$  at 293.15 K.

| Atom | Occupancy |
|------|-----------|
| O1   | 0.5       |
| C1   | 0.5       |
| H1   | 0.5       |

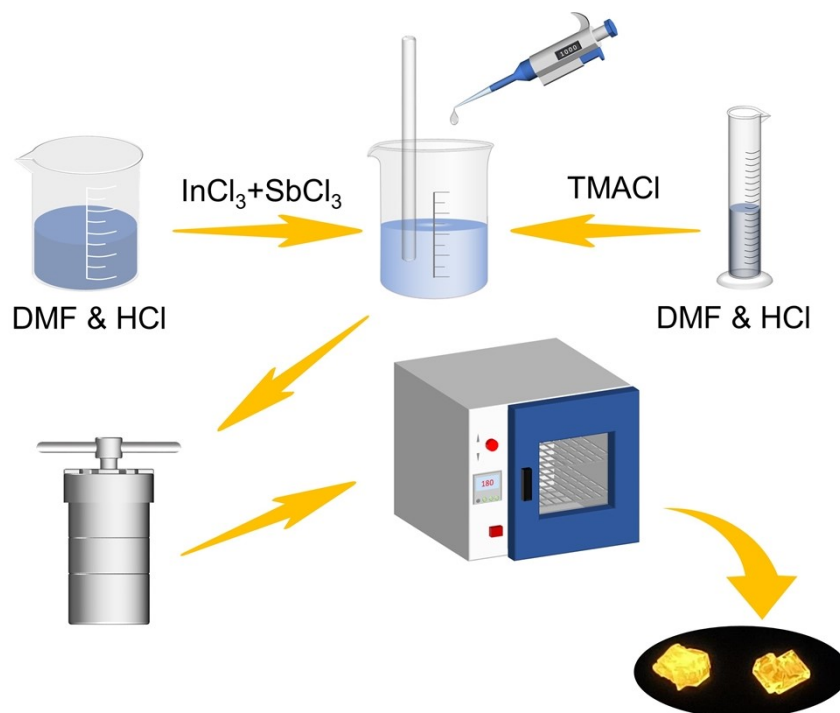

**Figure S1.** Schematic diagram of the preparation of  $(C_4H_{12}N)_2InCl_5 \cdot DMF$  and  $(C_4H_{12}N)_2InCl_5 \cdot DMF : Sb^{3+}$  single crystals via facile solution processing.

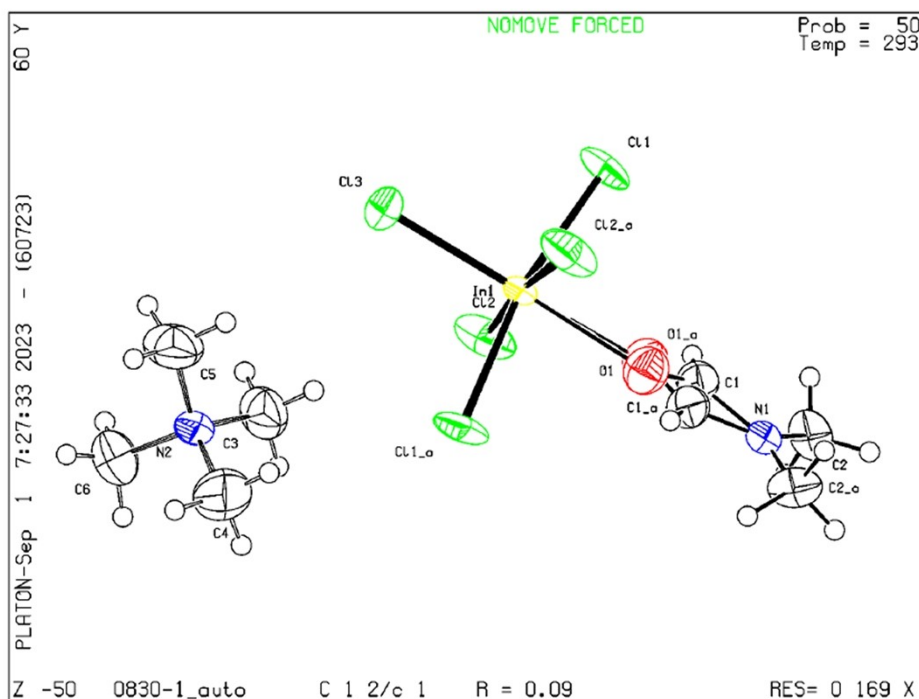

**Figure S2.** Oak Ridge thermal ellipsoid plot (ORTEP) for  $(C_4H_{12}N)_2InCl_5 \cdot DMF$ .

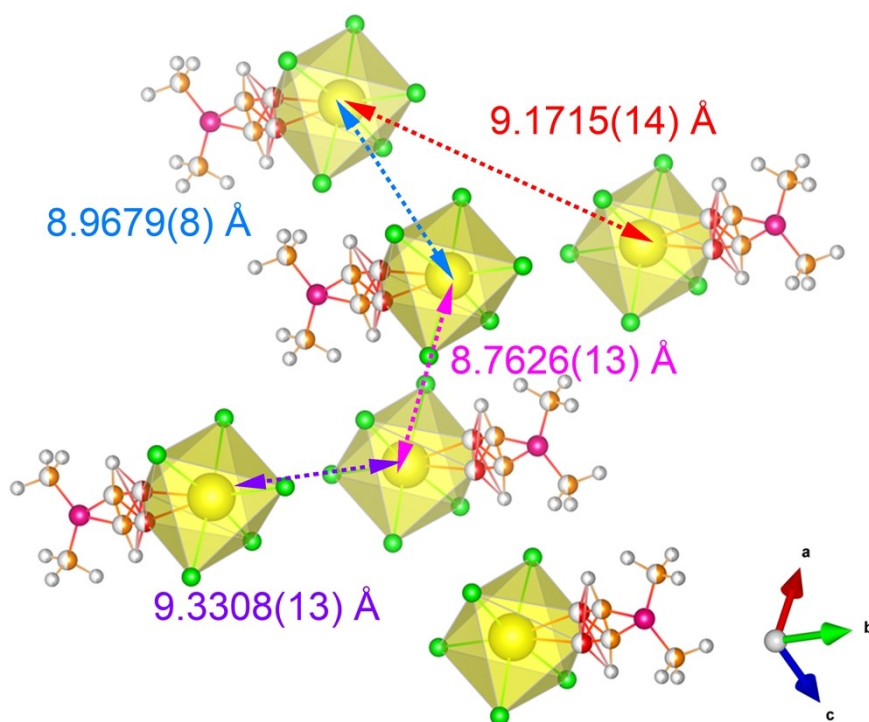

**Figure S3.** Crystal structure features of  $(\text{C}_4\text{H}_{12}\text{N})_2\text{InCl}_5 \cdot \text{DMF}$ .

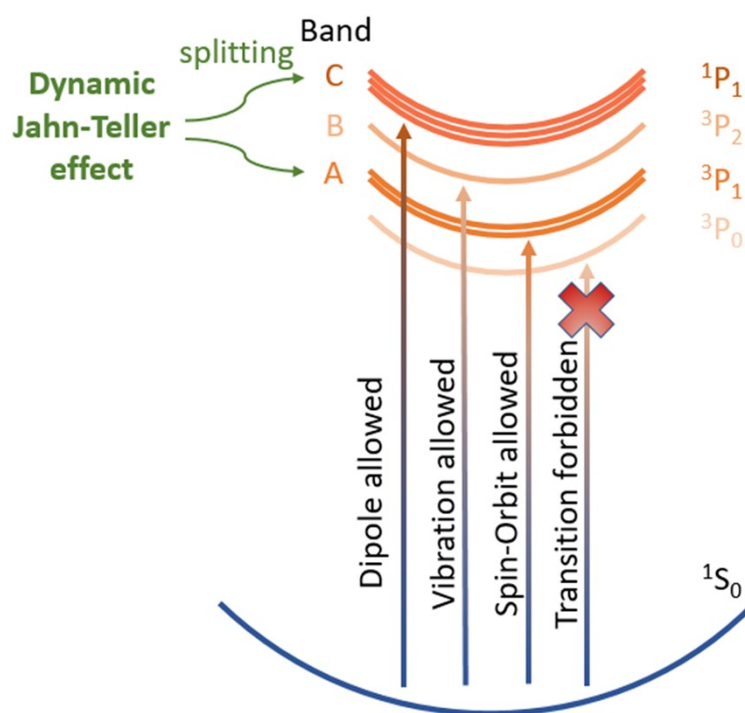

**Figure S4.** Schematic of the excitation process and excitation state of  $\text{Sb}^{3+}$  in metal halides.

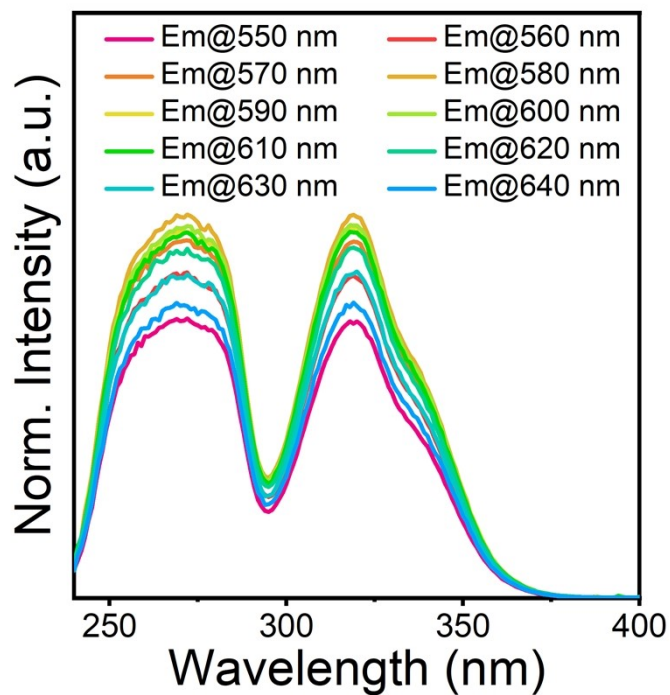

**Figure S5.** PLE curves of  $(C_4H_{12}N)_2InCl_5 \cdot DMF:Sb^{3+}$  monitored at different emission wavelengths.

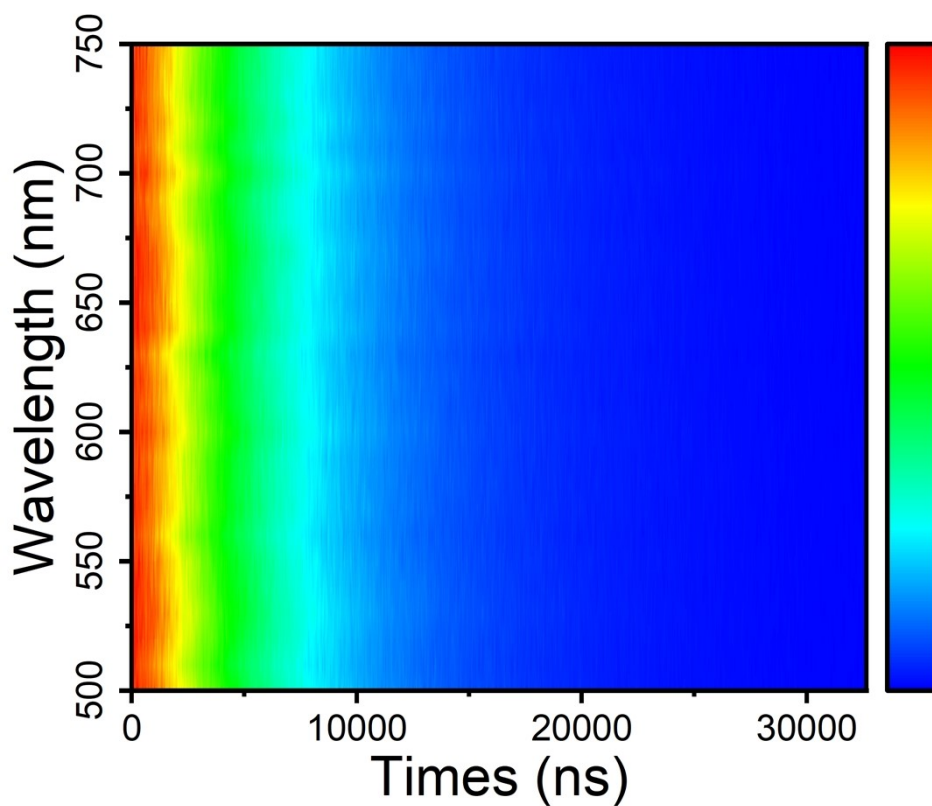

**Figure S6.** Emission wavelength scanning decay of  $(C_4H_{12}N)_2InCl_5 \cdot DMF:Sb^{3+}$  excited by 320 nm.

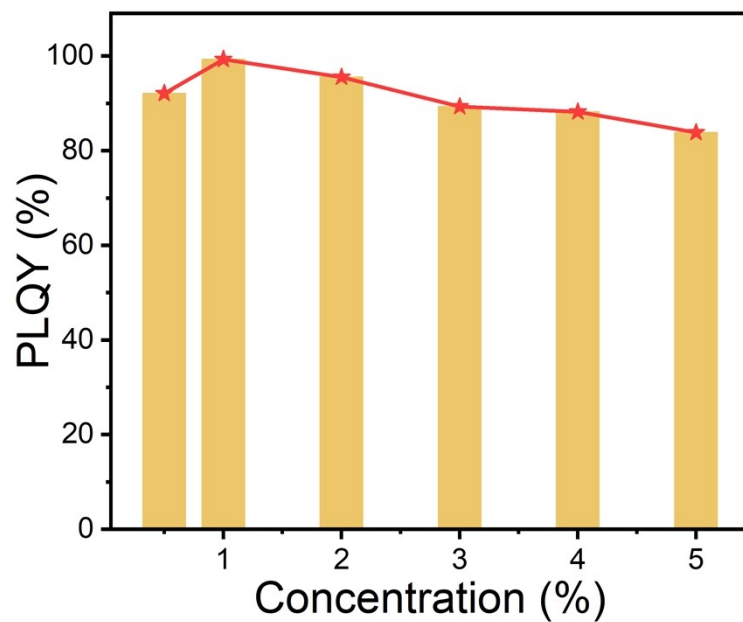

**Figure S7.** PLQY data for  $(\text{C}_4\text{H}_{12}\text{N})_2\text{InCl}_5 \cdot \text{DMF} : x\text{Sb}^{3+}$  samples at RT.

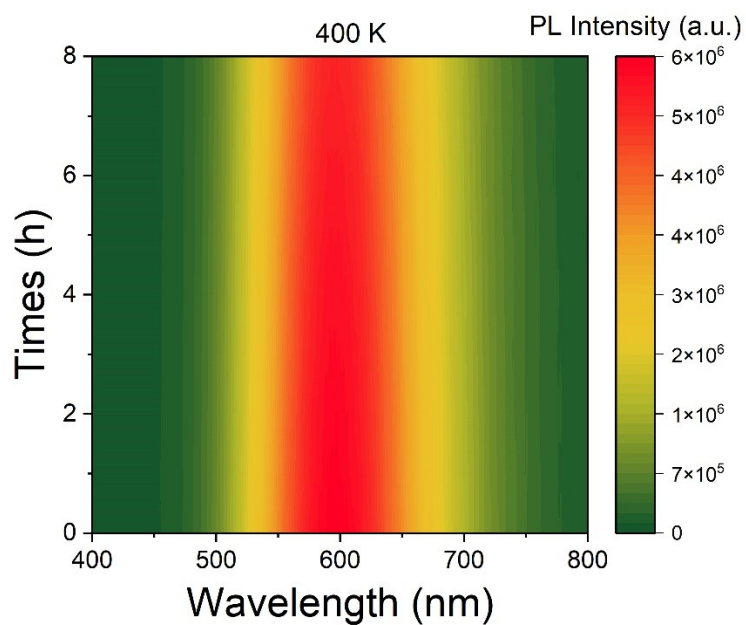

**Figure S8.** The PL-temperature correlation map of  $(\text{C}_4\text{H}_{12}\text{N})_2\text{InCl}_5 \cdot \text{DMF} : \text{Sb}^{3+}$  maintained at 400 K for 8 h.
